# Supplementary material for: Bridging the gap: an in-depth comparison of CVT-grown layered transition metal dichalcogenides for supercapacitor applications
Source: Royal Society of Chemistry journal article supplement (doi:10.1039/d3ma00672g), 2023-12-12
Supplement: d3ma00672g1.pdf [file d3ma00672g1.pdf]

## Electronic Supplementary Information

### **Bridging the gap: An in-depth comparison of the CVT-grown layered transition metal dichalcogenides for supercapacitor application**

Muhammad Habib,<sup>\*a†</sup> Zahir Muhammad,<sup>b†</sup> Yasir A. Haleem,<sup>\*c</sup> Sajid Farooq,<sup>d</sup> Raziq Nawaz,<sup>e</sup> Adnan Khalil,<sup>c</sup> Fozia Shaheen,<sup>f</sup> Hamza Naeem,<sup>g</sup> Sami Ullah<sup>h</sup> and Rashid Khan<sup>\*i</sup>

- 
- a. Department of Physics, COMSATS University Islamabad, Lahore campus, Lahore, Pakistan.*  
*b. Hefei Innovation Research Institute School of Integrated Circuit Science & Engineering, Beihang University, Hefei 230013, PR China.*  
*c. Institute of Physics, Khwaja Fareed University of Engineering & Information Technology, Rahim Yar Khan 64200, Pakistan.*  
*d. Centre for Lasers and Applications, Instituto de Pesquisas Energéticas e Nucleares, IPEN—CNEN, Sao Paulo 05508-000, Brazil.*  
*e. CAS key laboratory of Ion-beam engineering, Institute of Intelligent Machines, Hefei Institutes of Physical Science, Chinese Academy of Sciences, Hefei 230031, PR China.*  
*f. Department of Physics, Government College (GC) University, Lahore 54000, Pakistan.*  
*g. Department of Physics, Division of Science & Technology, University of Education, Lahore 54000, Pakistan.*  
*h. K.A.CARE Energy Research & Innovation Centre (ERIC), King Fahd University of Petroleum & Minerals (KFUPM), Dhahran 31261, Saudi Arabia.*  
*i. Zhejiang Provincial Key Laboratory of Advanced Chemical Engineering Manufacture Technology, College of Chemical and Biological Engineering, Zhejiang University, Hangzhou 310027, PR China.*

† These authors contributed equally to this work.

\* Correspondence Emails:

muhammad.habib@cuilahore.edu.pk (Muhammad Habib)

yasir.haleem@kfueit.edu.pk/hiyasir@mail.ustc.edu.cn (Yasir A. Haleem)

rashid@mail.ustc.edu.cn (Rashid Khan)

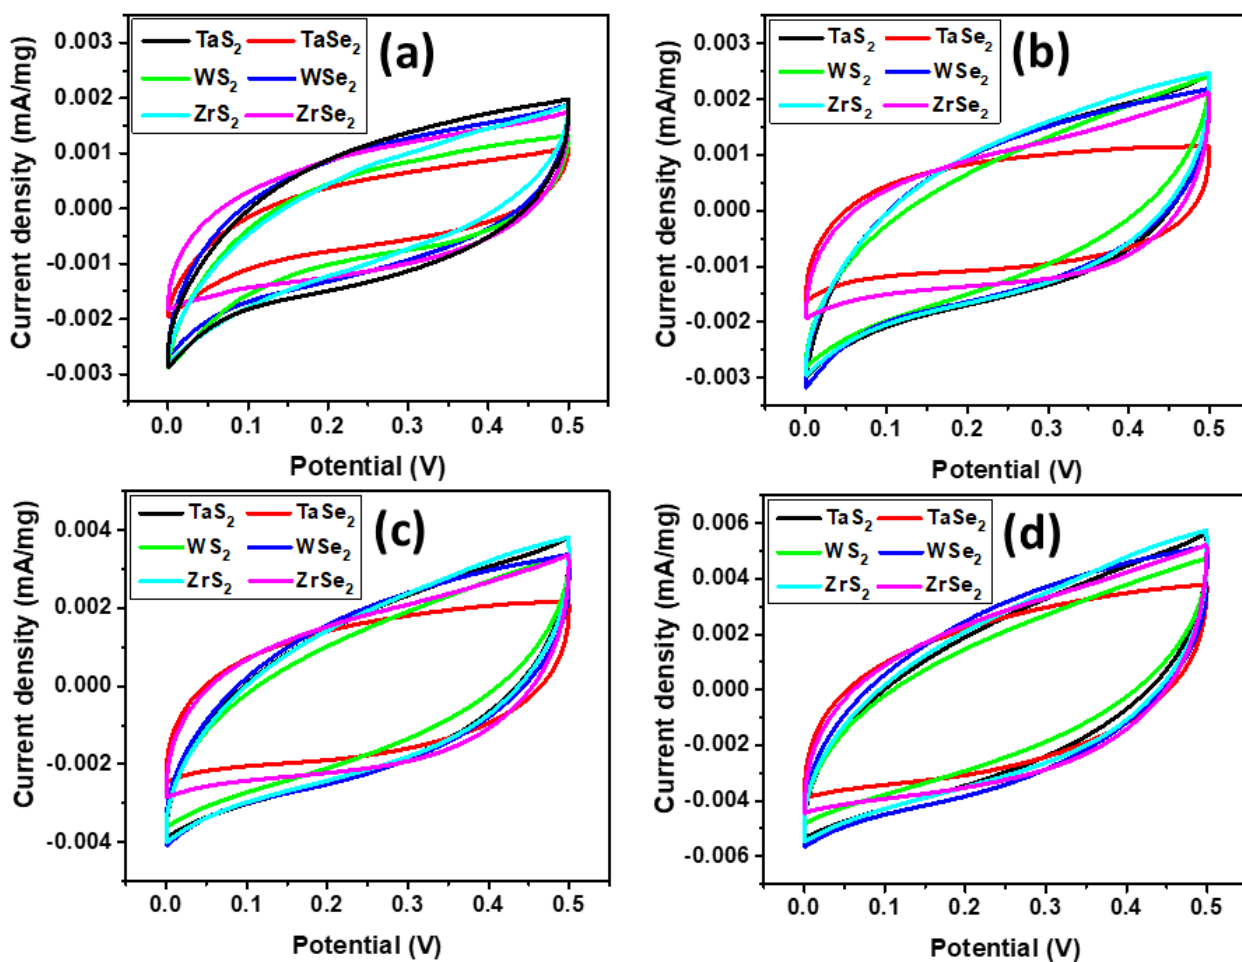

**Figure S1.** Cyclic voltammetry of the prepared electrodes at (a) 5, (b) 10, (c) 20 and (d) 40 mV/s scan rates.

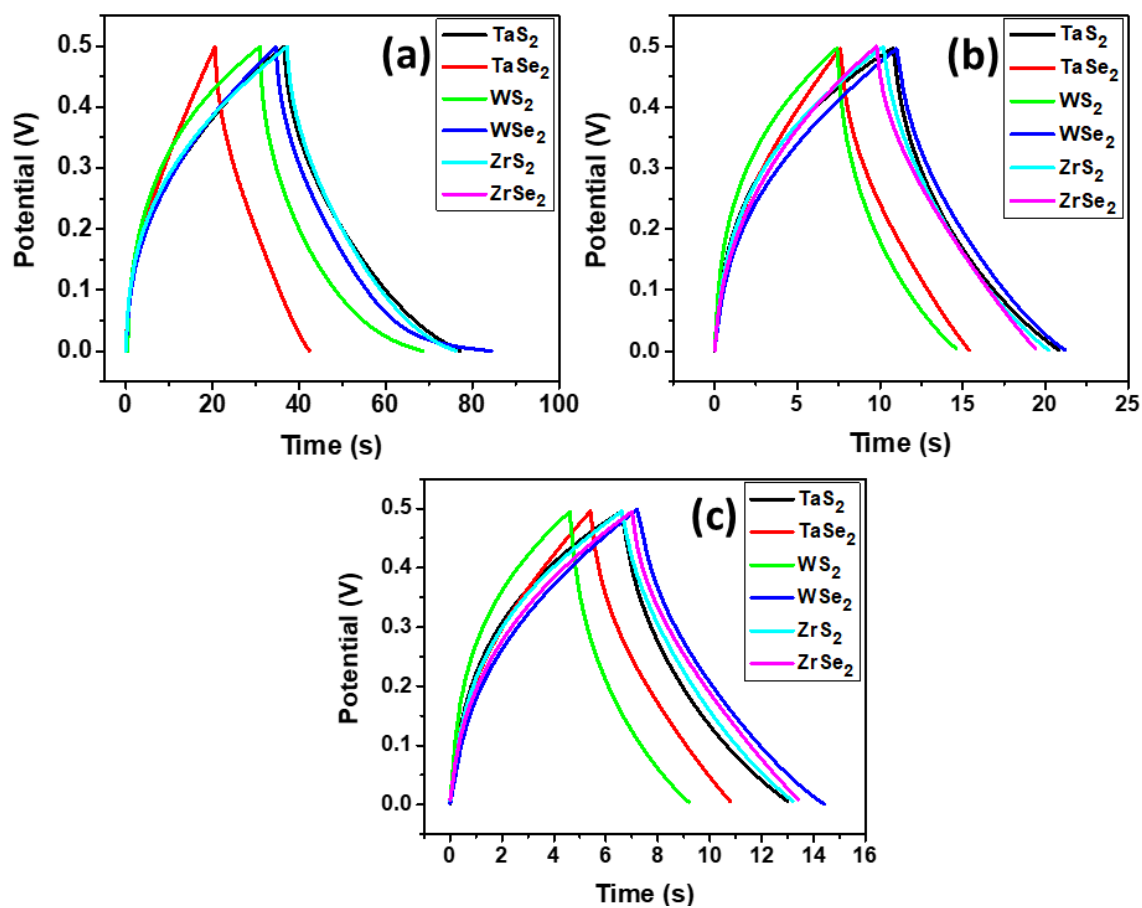

**Figure S2.** Galvanostatic charge-discharge curves measured at (a) 0.2 A/g, (b) 0.4 A/g and (c) 0.5 A/g current densities.

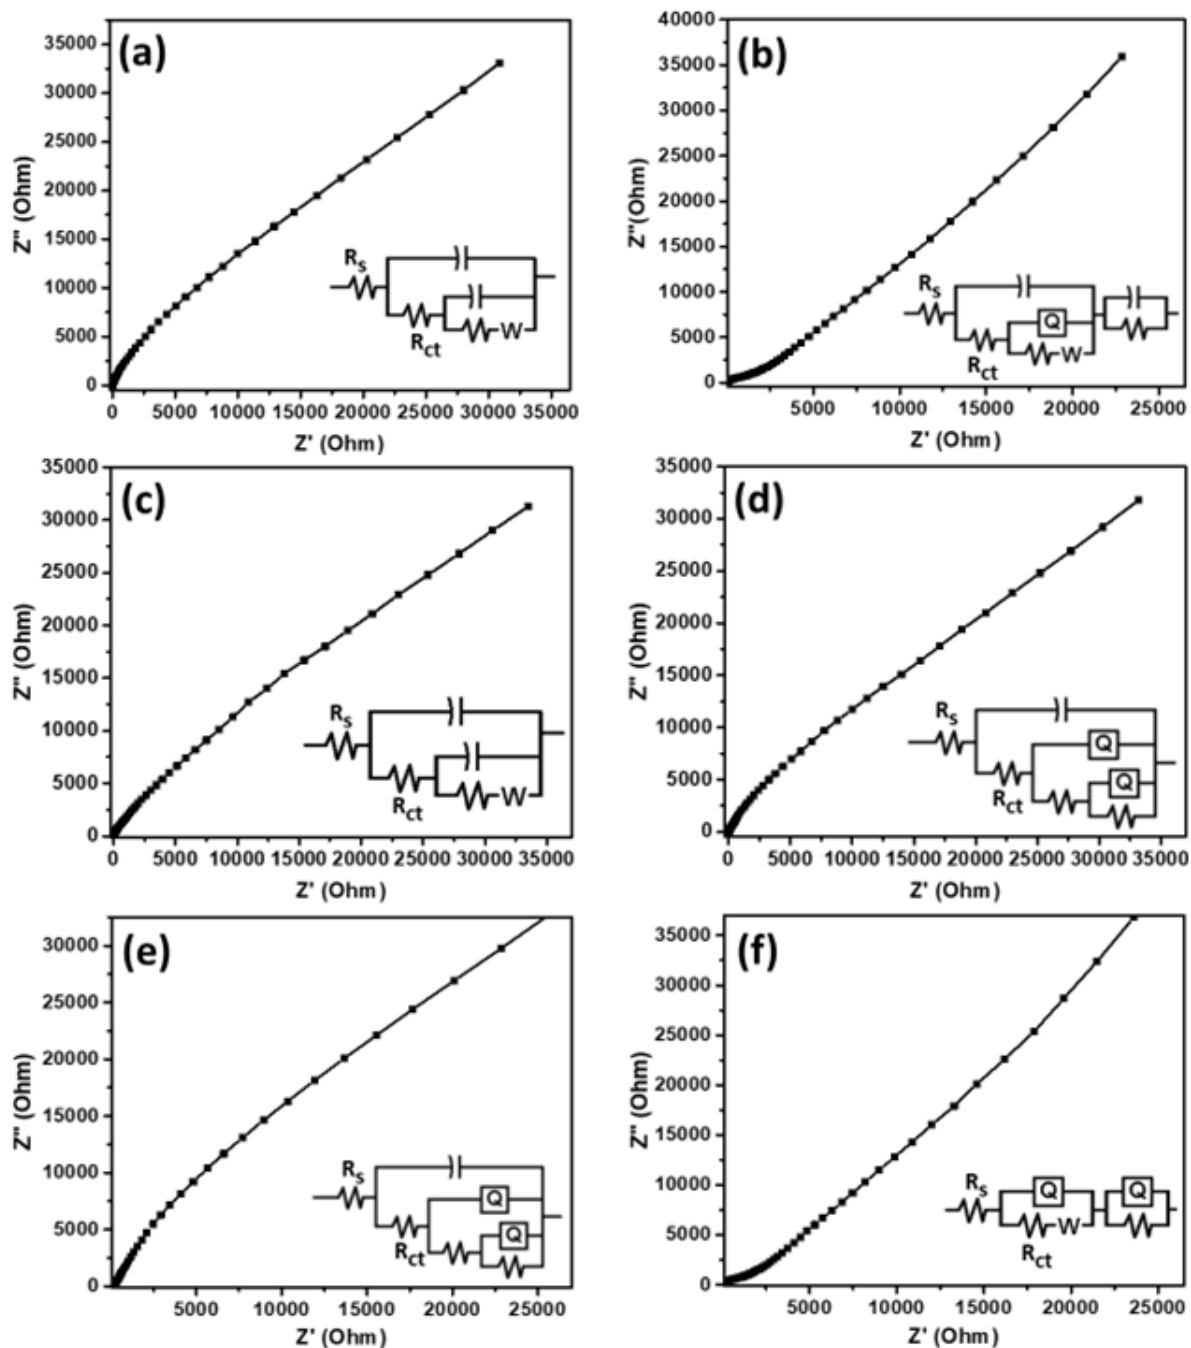

**Figure S3.** Electrochemical impedance spectroscopy plots of (a)  $\text{TaS}_2$ , (b)  $\text{TaSe}_2$ , (c)  $\text{WS}_2$ , (d)  $\text{WSe}_2$ , (e)  $\text{ZrS}_2$  and (f)  $\text{ZrSe}_2$  with inset circuit models.

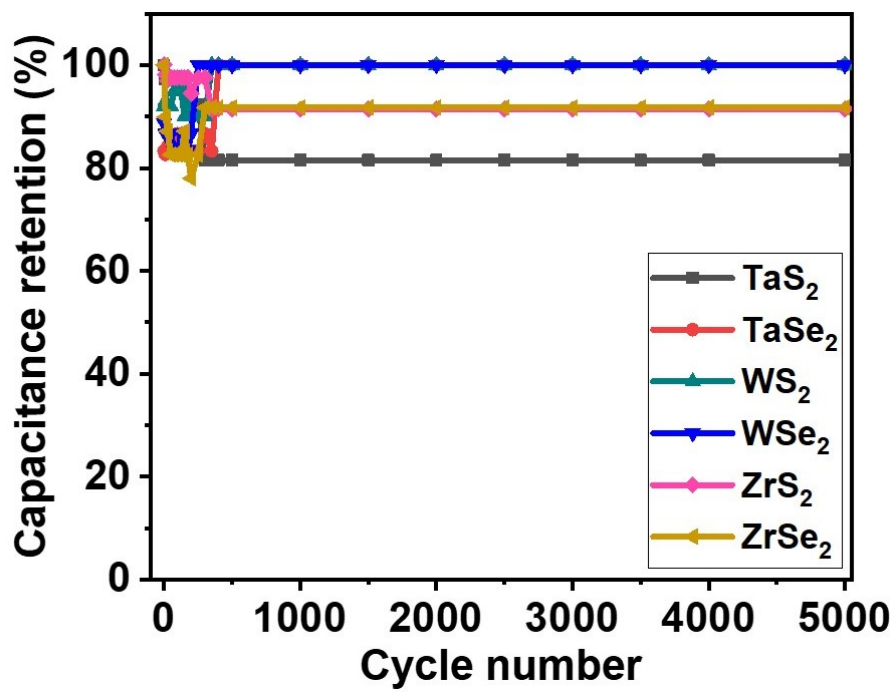

**Figure S4.** Combine stability curves of all the electrodes.

**Table S1:** A comparison of calculated gravimetric specific capacitances by both CV and GCD.

| <b>S #</b> | <b>Material</b>   | <b>Capacitance calculated by CV</b> | <b>Capacitance calculated by GCD</b> |
|------------|-------------------|-------------------------------------|--------------------------------------|
| <b>1</b>   | TaS <sub>2</sub>  | 230 F/g                             | 187 F/g                              |
| <b>2</b>   | TaSe <sub>2</sub> | 168 F/g                             | 89 F/g                               |
| <b>3</b>   | WS <sub>2</sub>   | 186 F/g                             | 154 F/g                              |
| <b>4</b>   | WSe <sub>2</sub>  | 224 F/g                             | 203 F/g                              |
| <b>5</b>   | ZrS <sub>2</sub>  | 225 F/g                             | 183 F/g                              |
| <b>6</b>   | ZrSe <sub>2</sub> | 209 F/g                             | 159 F/g                              |
